# Supplementary material for: SOCS3 deficiency in leptin receptor-expressing cells mitigates the development of pregnancy-induced metabolic changes
Source: PubMed Central journal article supplement — Mol Metab. 2014 Dec 19;4(3):237–45. doi: 10.1016/j.molmet.2014.12.005 (PMC4338315; doi:10.1016/j.molmet.2014.12.005), 2014-12-19
Supplement: mmc1.pdf [file mmc1.pdf]

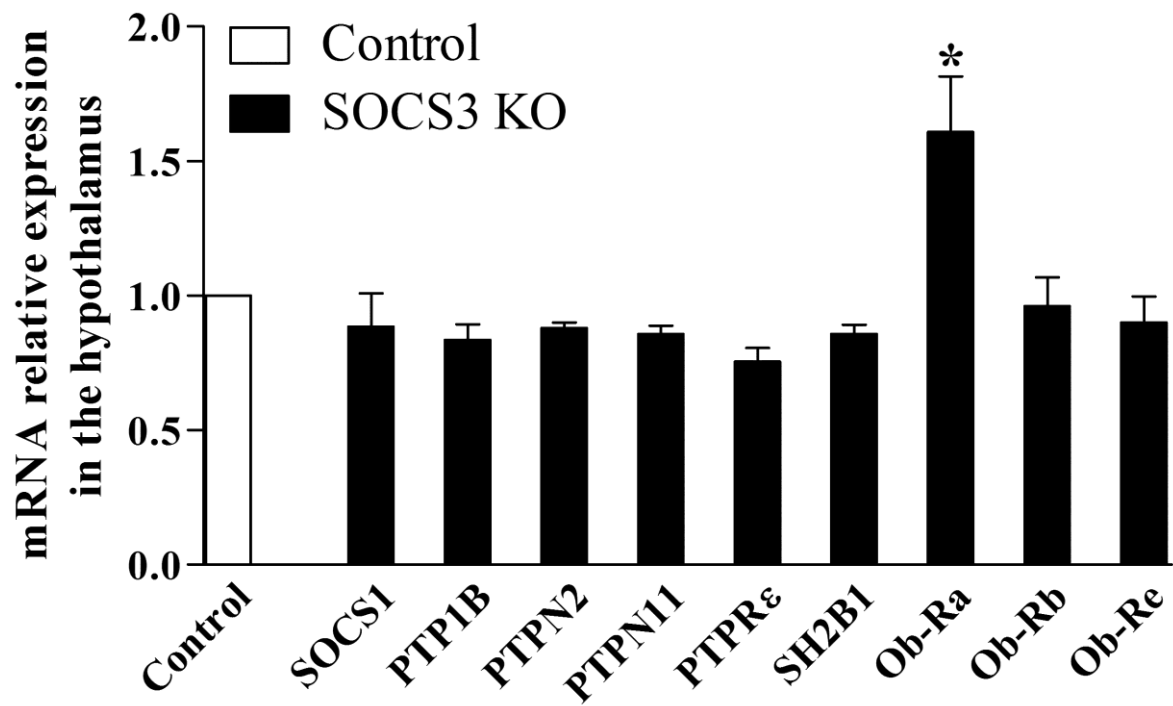

Supplemental Figure 1 Hypothalamic gene expression in pregnant control and SOCS3

KO mice ( $n = 8/\text{group}$ ). \*  $p < 0.05$ .

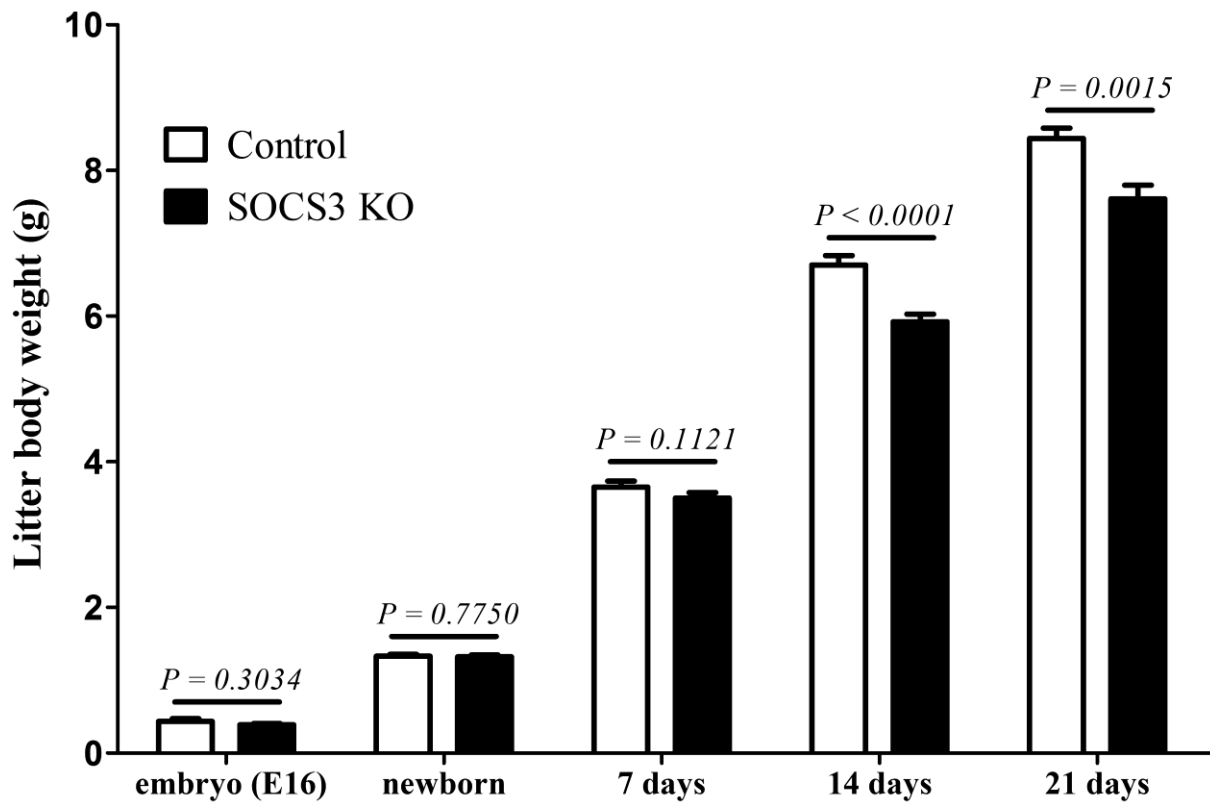

Supplemental Figure 2 Body weight of the pups from control and SOCS3 KO dams.

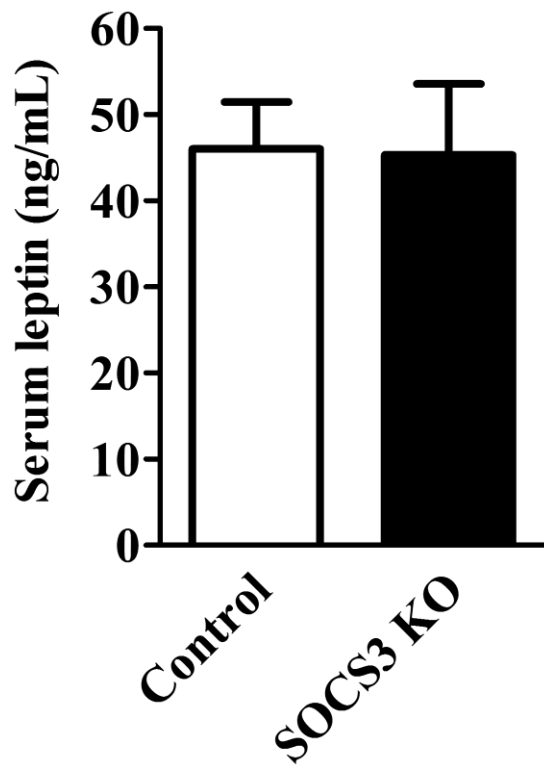

**Supplemental Figure 3 Serum leptin levels of leptin-treated control and SOCS3 KO**

**mice.** A micro-osmotic pump (model 1002; Alzet) was implanted s.c. at day 5 of pregnancy to infuse 0.5  $\mu$ g leptin/h and serum leptin levels were analyzed at day 16 of pregnant;

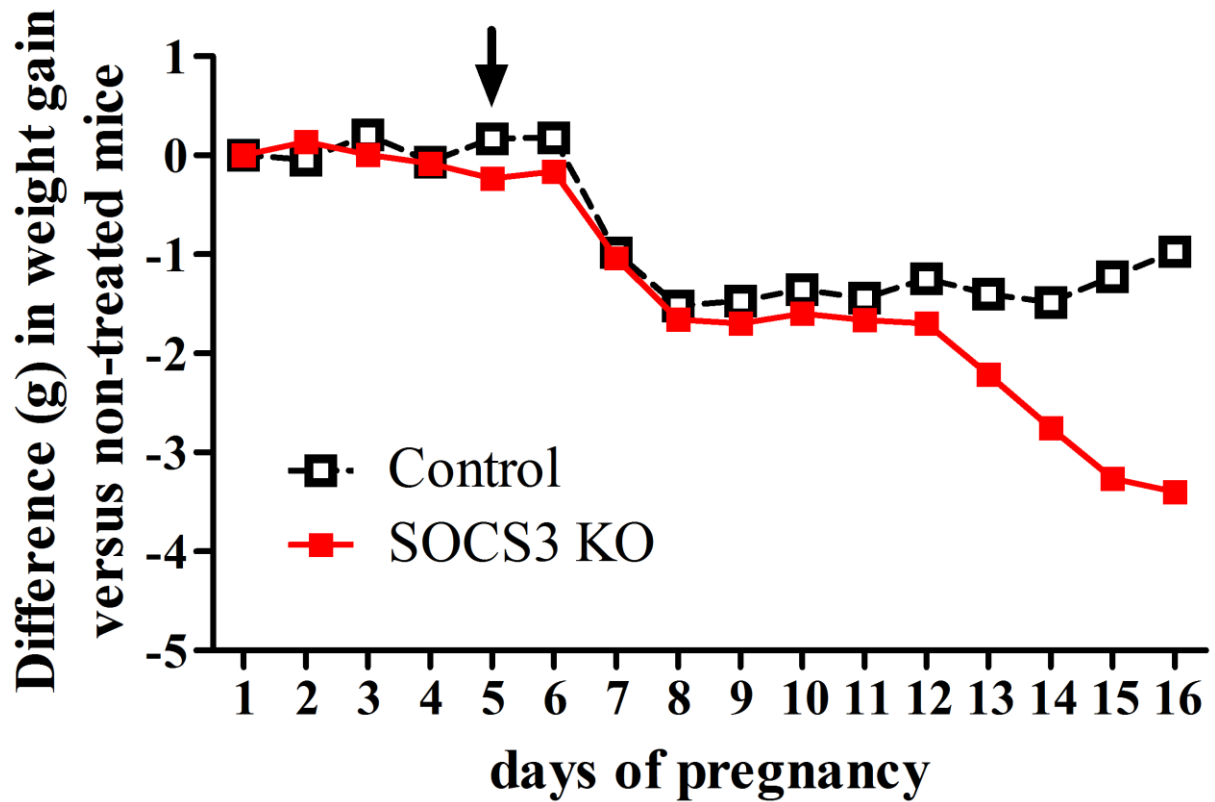

**Supplemental Figure 4** Difference in the weight gain compared to non-leptin treated mice. The arrow indicates the day (P5) that the osmotic pumps containing leptin were implanted into the animals. These results represent a different analysis from the data shown in Figures 3B and 3C.

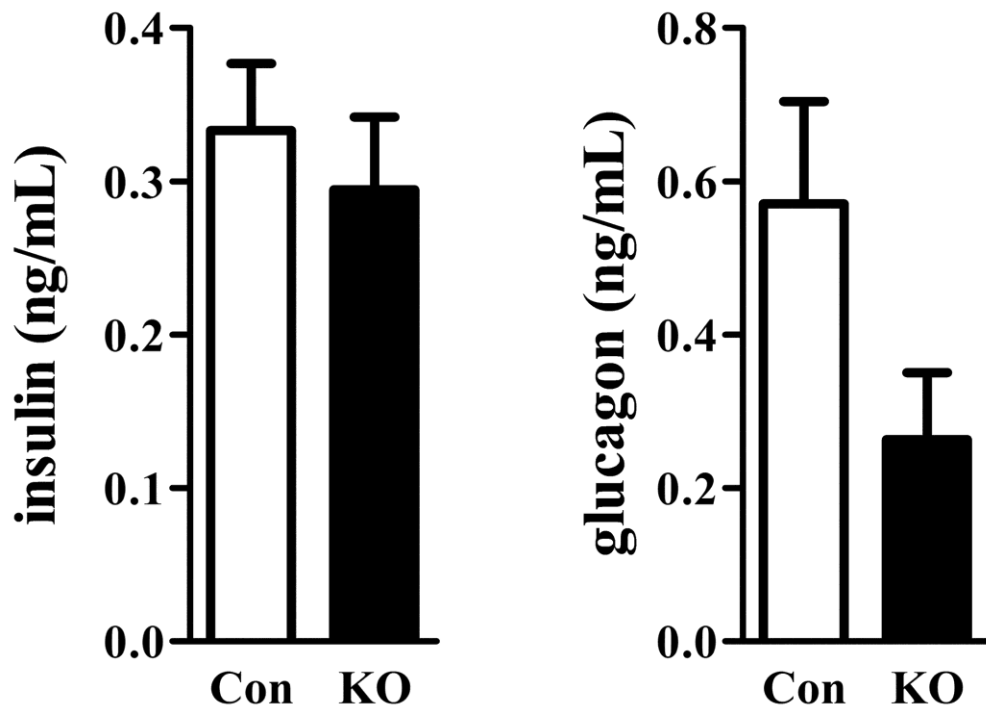

**Supplemental Figure 5 Hormone levels in pregnant control and SOCS3 KO mice.** No significant changes were observed in the serum concentrations of insulin ( $p = 0.56$ ) and glucagon ( $p = 0.07$ ) between the groups ( $n = 8/\text{group}$ ).

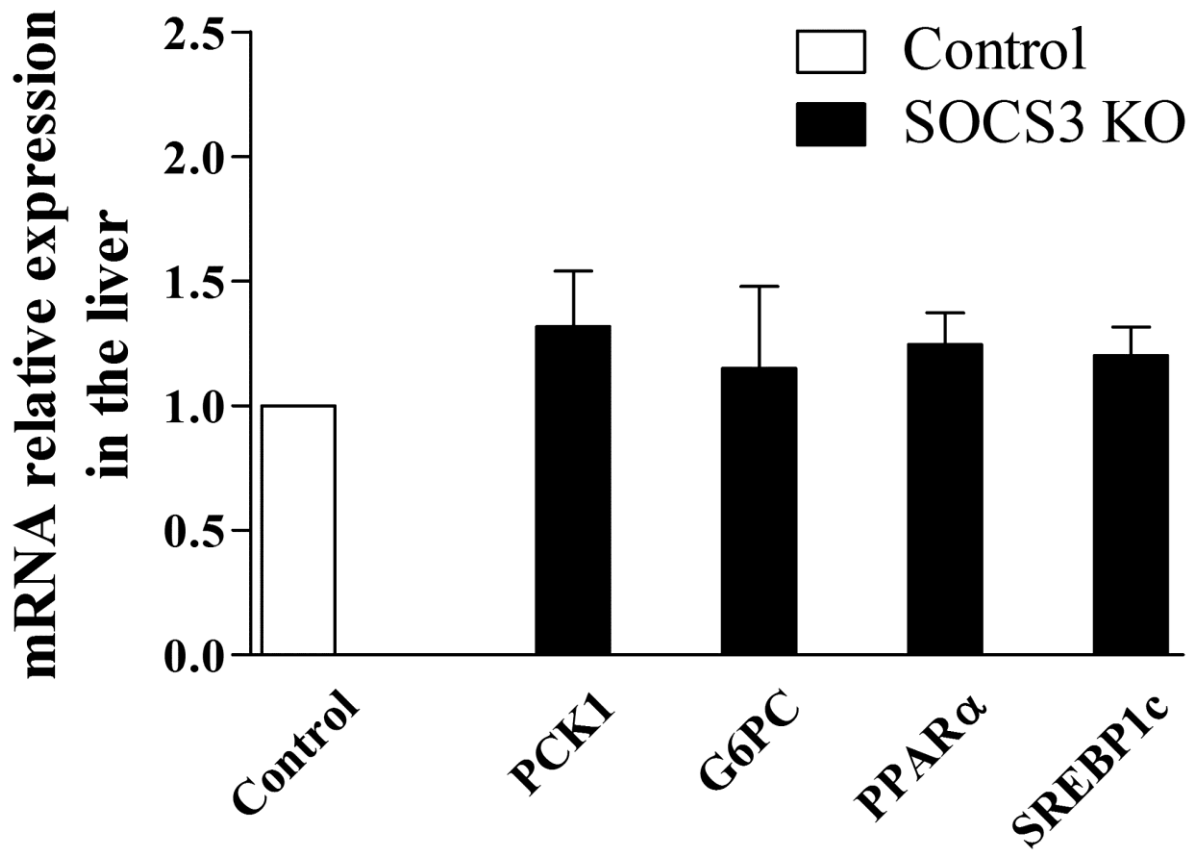

Supplemental Figure 6 Gene expression in the liver of pregnant control and SOCS3 KO mice ( $n = 8/\text{group}$ ).

**Supplemental Table 1 Primer sequences.**

| <b>Gene of interest</b> | <b>Accession no.</b> | <b>Forward primer (5'-3')</b> | <b>Reverse primer (5'-3')</b> | <b>Product size (bp)</b> |
|-------------------------|----------------------|-------------------------------|-------------------------------|--------------------------|
| ABCC8                   | NM_011510.3          | GTCTTCTGGAACAGCGCCT           | GTCCTGAGGCAATACCTGGG          | 63                       |
| ABCC9                   | NM_021041.2          | ATCGACATGGCCACGGAAAA          | GAGACACGGTGAGCTATGGT          | 91                       |
| ACTB                    | Mm_00607939_s1       | -                             | -                             | 115                      |
| Cyclophilin A           | NM_008907.1          | TATCTGCACTGCCAAGACTGAGT       | CTTCTTGCTGGTCTTGCCATTCC       | 128                      |
| GAPDH                   | GU21402.1            | CTCCCACTCTTCCACCTTCG          | CCACCACCCTGTTGCTGTAG          | 110                      |
| G6PC                    | NM_008061.3          | GCTGGAGTCTTGTCAGGCAT          | CGGAGGCTGGCATTGTAGAT          | 74                       |
| KCNJ11                  | NM_010602.3          | GCTGTCCCAGAAAGGGCATT          | CCTCCTCTCTCGAGTACGGT          | 94                       |
| KCNJ8                   | NM_008428.4          | CATGGAGAAGAGTGGCCTGG          | CGCAGACGTGAATGACCTGA          | 64                       |
| Ob-Ra                   | NM_001122899.1       | AATGACGCAGGGCTGTATGT          | ATGGACTGTTGGGAAGTTGG          | 238                      |
| Ob-Rb*                  | Mm01265583_m1        | -                             | -                             | 74                       |
| Ob-Re                   | NC_000070.6          | TGAAGATGATGGAATGAAGTGG        | AGTTGGCATCCTTATTTTGAGGT       | 161                      |
| PRKCδ                   | NM_011103.3          | AACTGGTCCCTCCTGGAGAA          | AGGGGATTTCACTTTGGGCT          | 63                       |
| PRKCθ                   | NM_008859.2          | GTCAGGGAGAGGCAGTGAAC          | TCTGCCCATTTTCTGATTCCAC        | 72                       |
| PTP1B                   | NM_011201.3          | GGCGTGGTCATGCTCAAC            | GCCAATACTGGGCACATTTTAA        | 61                       |
| PTPN11                  | NM_011202.3          | AACGACGGCAAGTCCAAAGT          | TGCTCCACCAGGTCTGTCAG          | 107                      |
| PTPN2                   | NM_008977.3          | GTGATCCATTGCAGTGCG            | TTCCATCAGAACAAGACAGGTAT       | 75                       |
| PTPRε*                  | Mm00448493_m1        | -                             | -                             | 68                       |
| SH2B1                   | NM_001081459.2       | CCATGGTGTCTTCTTGGTAC          | GTCCCTCCTCATTTAGTGAC          | 113                      |
| SOCS1*                  | Mm00782550_s1        | -                             | -                             | 88                       |
| SOCS3*                  | Mm00545913_s1        | -                             | -                             | 76                       |

\*, TaqMan Gene Expression Assay (Applied Biosystems).
